# Supplementary material
Source: Research Square preprint supplement (doi:10.21203/rs.3.rs-10127427/v1)
Supplement: Supplementary file 1 [file 9211540aa1f384713c54d931.xlsx]

## Sheet: Population Characteristics (2)
Table 1: Population characteristics for GBC cases and visitor controls
	All			Males			Females
Variables	Cases (%) n1 = 912	Controls (%) n2 = 1140	p-value	Cases (%) n1 = 296	Controls (%) n2 = 209	p-value	Cases (%) n1 = 616	Controls (%) n2 = 931	p-value
Age
<30	17 (1.86)	44 (3.86)	p <0.001	8 (2.7)	22 (10.53)	p <0.001	9 (1.46)	22 (2.36)	p = 0.001
30-39	131 (14.36)	210 (18.42)		46 (15.54)	40 (19.14)		85 (13.8)	170 (18.26)
40-49	261 (28.62)	387 (33.95)		70 (23.65)	59 (28.23)		191 (31.01)	328 (35.23)
50-59	315 (34.54)	354 (31.05)		101 (34.12)	60 (28.71)		214 (34.74)	294 (31.58)
≥60	186 (20.39)	145 (12.72)		71 (23.99)	28 (13.4)		115 (18.67)	117 (12.57)
Missing	2 (0.22)	0		-	-		2 (0.32)	0 (0)
Mean ± SD*	49.65 (± 10.11)	46.66 (± 10.21)		50.62 (± 10.78)	45.44 (± 11.86)		49.18 (± 9.75)	46.93 (± 9.78)
Sex
Males	296 (32.46)	209 (18.33)	p <0.001	-	-	-	-	-	-
Females	616 (67.54)	931 (81.67)		-	-		-	-
Missing		-		-	-		-	-
Birth risk regionsα
High-risk	754 (82.68)	601 (52.72)	p <0.001	244 (82.43 )	153 (73.21)	p = 0.013	510 (82.79)	448 (48.12)	p <0.001
Low-risk	156 (17.11)	539 (47.28)		52 (17.57)	56 (26.79)		104 (16.88)	483 (51.88)
Missing	2 (0.22)	0		-	-		2 (0.32)	0 (0)
Self-reported Gallstone history
Yes	363 (39.80)	37 (3.25)	p <0.001	93 (31.42)	3 (1.44)	p <0.001	270 (43.83)	34 (3.65)	p <0.001
No	543 (59.54)	1096 (96.14)		202 (68.24)	206 (98.56)		341 (55.36)	890 (95.6)
Missing	6 (0.66)	7 (0.61)		1 (0.34)	0 (0)		5 (0.81)	7 (0.75)
Any tobacco useβ
Yes	285 (31.25)	242 (21.23)	p <0.001	180 (60.81)	130 (62.2)	p = 0.457	105 (17.05)	112 (12.03)	p = 0.016
No	622 (68.20)	892 (78.25)		116 (39.19)	78 (37.32)		506 (82.14)	814 (87.43)
Missing	5 (0.55)	6 (0.53)		0	1 (0.48)		5 (0.81)	5 (0.54)
Mustard Oil consumptionγ
Yes	715 (78.40)	565 (49.56)	p <0.001	220 (74.32)	152 (72.73)	p = 0.383	495 (80.36)	413 (44.36)	p <0.001
No	190 (20.83)	570 (50.00)		75 (25.34)	54 (25.84)		115 (18.67)	516 (55.42)
Missing	7 (0.77)	5 (0.44)		1 (0.34)	3 (1.44)		6 (0.97)	2 (0.21)
Education (years)
< 5 years of education	376 (41.23)	261 (22.89)	p <0.001	46 (15.54)	20 (9.57)	p = 0.050	330 (53.57)	241 (25.89)	p <0.001
≥ 5 years of education	532 (58.33)	878 (77.02)		250 (84.46)	189 (90.43)		282 (45.78)	689 (74.01)
Missing	4 (0.44)	1 (0.09)		-	-		4 (0.65)	1 (0.11)
Abbreviations: GBC, Gallbladder Cancer; SD, Standarad Deviation. Numbers are presented as n (%) unless otherwise stated *Mean ±SD : Estimated for continous age variable. α High and low risk GBC regions based on incidence data from the National Cancer Registry programme and Cancer atlas of India : Bihar, Delhi, Himachal Pradesh, Punjab, Chandigarh, Rajasthan, Uttarakhand, Uttar Pradesh, Assam, Tri…

## Sheet: Population Characteristics
Table 1: Population characteristics for GBC cases and visitor controls
	All				Males				Females
Variables	Cases (%) n1 = 912	Controls (%) n2 = 1140	p-value		Cases (%) n1 = 296	Controls (%) n2 = 209	p-value		Cases (%) n1 = 616	Controls (%) n2 = 931	p-value
Age
<30	17 (1.86)	44 (3.86)	p <0.001		8 (2.7)	22 (10.53)	p <0.001		9 (1.46)	22 (2.36)	p = 0.001
30-39	131 (14.36)	210 (18.42)			46 (15.54)	40 (19.14)			85 (13.8)	170 (18.26)
40-49	261 (28.62)	387 (33.95)			70 (23.65)	59 (28.23)			191 (31.01)	328 (35.23)
50-59	315 (34.54)	354 (31.05)			101 (34.12)	60 (28.71)			214 (34.74)	294 (31.58)
≥60	186 (20.39)	145 (12.72)			71 (23.99)	28 (13.4)			115 (18.67)	117 (12.57)
Missing	2 (0.22)	0			-	-			2 (0.32)	0 (0)
Mean ± SD*	49.65 (± 10.11)	46.66 (± 10.21)			50.62 (± 10.78)	45.44 (± 11.86)			49.18 (± 9.75)	46.93 (± 9.78)
Sex
Males	296 (32.46)	209 (18.33)	p <0.001		-	-	-		-	-	-
Females	616 (67.54)	931 (81.67)			-	-			-	-
Missing		-			-	-			-	-
Birth risk regionsα
High-risk	754 (82.68)	601 (52.72)	p <0.001		244 (82.43 )	153 (73.21)	p = 0.013		510 (82.79)	448 (48.12)	p <0.001
Low-risk	156 (17.11)	539 (47.28)			52 (17.57)	56 (26.79)			104 (16.88)	483 (51.88)
Missing	2 (0.22)	0			-	-			2 (0.32)	0 (0)
Self-reported Gallstone history
Yes	363 (39.80)	37 (3.25)	p <0.001		93 (31.42)	3 (1.44)	p <0.001		270 (43.83)	34 (3.65)	p <0.001
No	543 (59.54)	1096 (96.14)			202 (68.24)	206 (98.56)			341 (55.36)	890 (95.6)
Missing	6 (0.66)	7 (0.61)			1 (0.34)	0 (0)			5 (0.81)	7 (0.75)
Any tobacco useβ
Yes	285 (31.25)	242 (21.23)	p <0.001		180 (60.81)	130 (62.2)	p = 0.457		105 (17.05)	112 (12.03)	p = 0.016
No	622 (68.20)	892 (78.25)			116 (39.19)	78 (37.32)			506 (82.14)	814 (87.43)
Missing	5 (0.55)	6 (0.53)			0	1 (0.48)			5 (0.81)	5 (0.54)
Mustard Oil consumptionγ
Yes	715 (78.40)	565 (49.56)	p <0.001		220 (74.32)	152 (72.73)	p = 0.383		495 (80.36)	413 (44.36)	p <0.001
No	190 (20.83)	570 (50.00)			75 (25.34)	54 (25.84)			115 (18.67)	516 (55.42)
Missing	7 (0.77)	5 (0.44)			1 (0.34)	3 (1.44)			6 (0.97)	2 (0.21)
Education (years)
< 5 years of education	376 (41.23)	261 (22.89)	p <0.001		46 (15.54)	20 (9.57)	p = 0.050		330 (53.57)	241 (25.89)	p <0.001
≥ 5 years of education	532 (58.33)	878 (77.02)			250 (84.46)	189 (90.43)			282 (45.78)	689 (74.01)
Missing	4 (0.44)	1 (0.09)			-	-			4 (0.65)	1 (0.11)
Abbreviations: GBC, Gallbladder Cancer; SD, Standarad Deviation. Numbers are presented as n (%) unless otherwise stated *Mean ±SD : Estimated for continous age variable. α High and low risk GBC regions based on incidence data from the National Cancer Registry programme and Cancer atlas of India : Bihar, Delhi, Himachal Pradesh, Punjab, Chandigarh, Rajasthan, Uttarakhand, Uttar Pradesh, Assam, Tri…
