# Supplementary material
Source: Research Square preprint supplement (doi:10.21203/rs.3.rs-10127427/v1)
Supplement: Supplementary file 2 [file a20eb48e3fa751eadc4aabda.xlsx]

## Sheet: Complete_table_with_gender
Table 2 :Unstratified & Birth residence risk, Gender stratified Odds ratio (with 95% CI) calculated for separate tertiles of Log transformed Metal values measured in Serum
Metals	Categories (ug/L)/ppb#	Median for categories (ppb)	Case/Control	OR† (95% CI)	p-value§
Chromium (Cr)	tert 1 ( 0.68 — 0.68 )	0.68	575 /823	ref
	tert 2 ( — )	-	-	-	-
	tert 3 (0.96 — 7.26)	1.61	337/317	1.55 (1.22 - 1.95)	≤0.005
	Ptrend 1		≤0.001
	Ptrend 2		0.012
Nickel (Ni)	tert 1 (0.48 — 0.89)	0.48	245/380	ref
	tert 2 (0.89 — 1.38)	1.09	331/380	1.18 (0.90 - 1.56)	0.219
	tert 3 (1.39 — 16.61)	1.86	336/380	1.46 (1.11 - 1.91)	0.006
	Ptrend 1		0.006
	Ptrend 2		0.935
Arsenic (As)	tert 1 (0.04 — 0.16)	0.11	276/380	ref
	tert 2 (0.16 — 0.32)	0.22	334/380	0.81 (0.62 - 1.06)	0.132
	tert 3 (0.32 — 6.99)	0.53	302/380	0.77 (0.59 - 1.02)	0.078
	Ptrend 1		0.08
	Ptrend 2		0.106
Cadmium (Cd)	tert 1 (0.02 — 0.02)	0.02	191/627	ref
	tert 2 (0.03 — 0.04)	0.03	88/133	2.09 (1.41 - 3.09)	≤0.005
	tert 3 (0.04 — 0.24)	0.07	633/380	4.79 (3.69 - 6.21)	≤0.005
	Ptrend 1		≤0.001
	Ptrend 2		≤0.001
Lead (Pb)	tert 1 (0.18 — 0.18)	0.18	482/690	ref
	tert 2 (0.26 — 0.30)	0.28	57/70	1.12 (0.71 - 1.79)	0.607
	tert 3 (0.31 — 11.8)	0.6	373/380	1.27 (1.01 - 1.61)	0.037
	Ptrend 1		0.037
	Ptrend 2		0.536
Uranium (U)	tert 1 (0.00 — 0.01)	0	249/380	ref
	tert 2 (0.01 — 0.01)	0.01	190/380	0.74 (0.54 - 0.99)	0.05
	tert 3 (0.01 — 0.09)	0.06	473/380	1.69 (1.29 - 2.21)	≤0.005
	Ptrend 1		≤0.001
	Ptrend 2		≤0.001
Manganese (Mn)	tert 1 (0.43 — 0.88)	0.67	115/380	ref
	tert 2 (0.88 — 1.40)	1.11	184/380	1.67 (1.18 - 2.36)	≤0.005
	tert 3 (1.40 — 20.85)	6.45	613/380	4.88 (3.57 - 6.67)	≤0.005
	Ptrend 1		≤0.001
	Ptrend 2		≤0.001
Copper (Cu)	tert 1 (0.96 — 1082.29)	954.7	140/380	ref
	tert 2 (1082.91 — 1259.84)	1174.06	118/380	1.39 (0.95 - 2.04)	0.086
	tert 3 (1260.14 — 1975.50)	1544.26	654/380	10.21 (7.30 - 14.27)	≤0.005
	Ptrend 1		≤0.001
	Ptrend 2		≤0.001
Selenium (Se)	tert 1 (0.484 — 99.37)	84.74	519/380	ref
	tert 2 (99.39 — 118.67)	108.65	219/380	0.36 (0.28 - 0.48)	≤0.005
	tert 3 (118.68 — 213.81)	132.79	174/380	0.29 (0.21 - 0.38)	≤0.005
	Ptrend 1		≤0.001
	Ptrend 2		≤0.001
Abbreviations: GBC, Gallbladder cancer; OR, Odds Ratio; CI, Confidence Interval; tert, tertile; MDL, Method detection limit; ppb, parts per billion; µl, microliters; µg/L, microgram per liter #Exposure categories were derived from MDL and 99th percentile using the control group. † - MDL is calculated using standard deviation of all method blanks multiplied by a factor of 3.33. Weighted MDL is der…

## Sheet: Complete_table_with_gender (2)
Table 2 :Unstratified & Birth residence risk, Gender stratified Odds ratio (with 95% CI) calculated for separate tertiles of Log transformed Metal values measured in Serum
Metals	Categories (ug/L)/ppb#	Median for categories (ppb)	Case/Control	OR† (95% CI)	p-value§
Chromium (Cr)	tert 1 ( 0.68 — 0.68 )	0.68	575 /823	ref
	tert 2 ( — )	-	-	-	-
	tert 3 (0.96 — 7.26)	1.61	337/317	1.55 (1.22 - 1.95)	≤0.005
	Ptrend 1		≤0.001
	Ptrend 2		0.012
Nickel (Ni)	tert 1 (0.48 — 0.89)	0.48	245/380	ref
	tert 2 (0.89 — 1.38)	1.09	331/380	1.18 (0.90 - 1.56)	0.219
	tert 3 (1.39 — 16.61)	1.86	336/380	1.46 (1.11 - 1.91)	0.006
	Ptrend 1		0.006
	Ptrend 2		0.935
Arsenic (As)	tert 1 (0.04 — 0.16)	0.11	276/380	ref
	tert 2 (0.16 — 0.32)	0.22	334/380	0.81 (0.62 - 1.06)	0.132
	tert 3 (0.32 — 6.99)	0.53	302/380	0.77 (0.59 - 1.02)	0.078
	Ptrend 1		0.08
	Ptrend 2		0.106
Cadmium (Cd)	tert 1 (0.02 — 0.02)	0.02	191/627	ref
	tert 2 (0.03 — 0.04)	0.03	88/133	2.09 (1.41 - 3.09)	≤0.005
	tert 3 (0.04 — 0.24)	0.07	633/380	4.79 (3.69 - 6.21)	≤0.005
	Ptrend 1		≤0.001
	Ptrend 2		≤0.001
Lead (Pb)	tert 1 (0.18 — 0.18)	0.18	482/690	ref
	tert 2 (0.26 — 0.30)	0.28	57/70	1.12 (0.71 - 1.79)	0.607
	tert 3 (0.31 — 11.8)	0.6	373/380	1.27 (1.01 - 1.61)	0.037
	Ptrend 1		0.037
	Ptrend 2		0.536
Uranium (U)	tert 1 (0.00 — 0.01)	0	249/380	ref
	tert 2 (0.01 — 0.01)	0.01	190/380	0.74 (0.54 - 0.99)	0.05
	tert 3 (0.01 — 0.09)	0.06	473/380	1.69 (1.29 - 2.21)	≤0.005
	Ptrend 1		≤0.001
	Ptrend 2		≤0.001
Manganese (Mn)	tert 1 (0.43 — 0.88)	0.67	115/380	ref
	tert 2 (0.88 — 1.40)	1.11	184/380	1.67 (1.18 - 2.36)	≤0.005
	tert 3 (1.40 — 20.85)	6.45	613/380	4.88 (3.57 - 6.67)	≤0.005
	Ptrend 1		≤0.001
	Ptrend 2		≤0.001
Copper (Cu)	tert 1 (0.96 — 1082.29)	954.7	140/380	ref
	tert 2 (1082.91 — 1259.84)	1174.06	118/380	1.39 (0.95 - 2.04)	0.086
	tert 3 (1260.14 — 1975.50)	1544.26	654/380	10.21 (7.30 - 14.27)	≤0.005
	Ptrend 1		≤0.001
	Ptrend 2		≤0.001
Selenium (Se)	tert 1 (0.484 — 99.37)	84.74	519/380	ref
	tert 2 (99.39 — 118.67)	108.65	219/380	0.36 (0.28 - 0.48)	≤0.005
	tert 3 (118.68 — 213.81)	132.79	174/380	0.29 (0.21 - 0.38)	≤0.005
	Ptrend 1		≤0.001
	Ptrend 2		≤0.001
Abbreviations: GBC, Gallbladder cancer; OR, Odds Ratio; CI, Confidence Interval; tert, tertile; MDL, Method detection limit; ppb, parts per billion; µl, microliters; µg/L, microgram per liter #Exposure categories were derived from MDL and 99th percentile using the control group. † - MDL is calculated using standard deviation of all method blanks multiplied by a factor of 3.33. Weighted MDL is der…
